# Supplementary material for: The Effect of Adverse Surgical Margins on the Risk of Biochemical Recurrence after Robotic-Assisted Radical Prostatectomy
Source: MDPI journal article supplement (doi:10.3390/biomedicines10081911), 2022-08-07
Supplement: s1 [file s1]

## Supplementary files

**Table S1.** Univariable Cox regression models predicting biochemical recurrence after RARP

| Variable                                                        | Univariable Analysis |          |
|-----------------------------------------------------------------|----------------------|----------|
|                                                                 | HR (95% CI)          | p-value  |
| Preoperative PSA $\geq 10$ (vs $<10$ )                          | 1.35 (0.72-2.54)     | 0.353    |
| ISUP 2-3(vs 1)                                                  | 3.77 (1.35-10.54)    | 0.011    |
| ISUP $\geq 4$ (vs 1)                                            | 12.81 (4.24-38.72)   | $<0.001$ |
| pT3-T4 (vs T2)                                                  | 1.87 (1.10-3.19)     | 0.021    |
| SVI (vs no SVI)                                                 | 2.87 (1.23-6.68)     | 0.014    |
| PSM (vs neg)                                                    | 3.74 (2.18-6.41)     | $<0.001$ |
| PSM $<3$ mm (vs neg)                                            | 2.46 (1.18-5.15)     | 0.017    |
| PSM $\geq 3$ mm (vs neg)                                        | 4.66 (2.63-8.27)     | $<0.001$ |
| PSM unifocal (vs neg)                                           | 3.59 (2.03-6.35)     | $<0.001$ |
| PSM multifocal (vs neg)                                         | 4.23 (2.01-8.92)     | $<0.001$ |
| PSM with Gleason at margin 3 (vs neg)                           | 3.15 (1.69-5.88)     | $<0.001$ |
| PSM with Gleason at margin $>3$ (vs neg)                        | 6.06 (2.83-12.99)    | $<0.001$ |
| PSM $<3$ mm or unifocal                                         | 3.50 (1.99-6.17)     | $<0.001$ |
| PSM $\geq 3$ mm and multifocal (vs neg)                         | 4.75 (2.20-10.26)    | $<0.001$ |
| PSM $<3$ mm or unifocal or Gleason at margin 3                  | 3.22 (1.87-5.56)     | $<0.001$ |
| PSM $\geq 3$ mm, multifocal and Gleason at margin $>3$ (vs neg) | 15.17 (4.42-39.27)   | $<0.001$ |

RARP = Robotic-assisted radical prostatectomy; HR = Hazard ratio; CI = Confidence interval; PSA = Prostate-specific antigen; SVI = Seminal vesicle invasion; PSM = Positive surgical margins; neg = negative surgical margins.

**Table S2.** Univariable and multivariable\* Cox regression models predicting biochemical recurrence after RARP and the role of PSM location

| Variable           | Univariable Analysis |          | Multivariable Analysis* |          |
|--------------------|----------------------|----------|-------------------------|----------|
|                    | HR (95% CI)          | p-value  | HR (95% CI)             | p-value  |
| Apex (vs neg)      | 4.38 (2.17-8.83)     | $<0.001$ | 4.88 (2.37-10.03)       | $<0.001$ |
| Posterior (vs neg) | 3.41 (1.66-7.00)     | 0.001    | 3.42 (1.64-7.12)        | 0.001    |
| Lateral (vs neg)   | 1.31 (0.18-9.73)     | 0.795    | 1.36 (0.18-10.28)       | 0.765    |
| Anterior (vs neg)  | 3.64 (0.85-15.64)    | 0.083    | 2.42 (0.55-10.66)       | 0.243    |
| Vesical (vs neg)   | 3.48 (0.47-26.00)    | 0.224    | 3.64 (0.46-28.58)       | 0.219    |
| Multiple (vs neg)  | 4.23 (2.01-8.92)     | $<0.001$ | 4.16 (1.90-9.09)        | $<0.001$ |

---

\*Adjusted for preoperative PSA, pathologic stage (pT) and pathologic ISUP.

RARP = Robotic-assisted radical prostatectomy; HR = Hazard ratio; CI = Confidence Interval; PSM = Positive surgical margins; neg = negative surgical margins.
